# Supplementary material for: Computerized Cognitive Training in Children With Autism and Intellectual Disabilities: Feasibility and Satisfaction Study
Source: PubMed Central journal article supplement (PMC5993974; doi:10.2196/mental.9564), 2018-05-25
Supplement: mental_v5i2e40_app1.pdf [file mental_v5i2e40_app1.pdf]

Summary of parent posttraining ratings for 25 participants who completed all 25 sessions of Cogmed working memory training by Cogmed version.

| Item <sup>a,b</sup>      |                                                    | Cogmed Version         |                         |         |                       |                        |                         |         |                       |
|--------------------------|----------------------------------------------------|------------------------|-------------------------|---------|-----------------------|------------------------|-------------------------|---------|-----------------------|
|                          |                                                    | JM <sup>c</sup> (n=14) |                         |         |                       | RM <sup>d</sup> (n=11) |                         |         |                       |
|                          |                                                    | Mean (SD)              | Percentage <sup>e</sup> |         |                       | Mean (SD)              | Percentage <sup>e</sup> |         |                       |
|                          |                                                    |                        | Agree <sup>f</sup>      | Neutral | Disagree <sup>g</sup> |                        | Agree <sup>f</sup>      | Neutral | Disagree <sup>g</sup> |
| <b>Satisfaction</b>      |                                                    |                        |                         |         |                       |                        |                         |         |                       |
|                          | 1. Staff show interest and concern                 | 4.36 (0.63)            | 93                      | 7       | 0                     | 4.73 (0.47)            | 100                     | 0       | 0                     |
|                          | 2. Staff are skilled                               | 4.43 (0.65)            | 93                      | 7       | 0                     | 4.73 (0.47)            | 100                     | 0       | 0                     |
|                          | 3. Treatment is of high quality                    | 4.07 (1.14)            | 79                      | 14      | 7                     | 4.45 (0.52)            | 100                     | 0       | 0                     |
|                          | 4. I would recommend this to others                | 4.21 (0.58)            | 93                      | 7       | 0                     | 4.18 (0.60)            | 91                      | 9       | 0                     |
| <b>Perceived utility</b> |                                                    |                        |                         |         |                       |                        |                         |         |                       |
|                          | 5. Child's attention/behavior improved             | 3.50 (0.52)            | 50                      | 50      | 0                     | 3.64 (0.81)            | 64                      | 27      | 9                     |
|                          | 6. Child's peer relations improved                 | 3.29 (0.47)            | 29                      | 71      | 0                     | 3.36 (0.81)            | 36                      | 55      | 9                     |
|                          | 7. Child's study skills improved <sup>h</sup>      | 3.29 (0.47)            | 29                      | 71      | 0                     | 3.44 (0.73)            | 33                      | 67      | 0                     |
|                          | 8. Child's homework improved <sup>i</sup>          | 3.25 (0.45)            | 25                      | 75      | 0                     | 3.86 (0.69)            | 71                      | 29      | 0                     |
|                          | 9. Child's self-esteem/attitude improved           | 3.21 (0.43)            | 21                      | 79      | 0                     | 3.45 (0.82)            | 45                      | 45      | 9                     |
|                          | 10. Relationship with child improved               | 3.36 (0.50)            | 36                      | 64      | 0                     | 3.55 (0.69)            | 45                      | 55      | 0                     |
|                          | 11. Child made progress in training                | 3.64 (0.50)            | 64                      | 36      | 0                     | 4.18 (0.60)            | 91                      | 9       | 0                     |
|                          | 12. WMT approach is appropriate                    | 4.14 (0.53)            | 93                      | 7       | 0                     | 3.73 (0.79)            | 73                      | 18      | 9                     |
| <b>Motivation</b>        |                                                    |                        |                         |         |                       |                        |                         |         |                       |
|                          | 13. Child enjoyed the training                     | 3.64 (0.93)            | 64                      | 21      | 14                    | 3.91 (0.54)            | 82                      | 18      | 0                     |
|                          | 14. Easy to keep child motivated                   | 3.50 (0.94)            | 64                      | 14      | 21                    | 3.36 (1.29)            | 45                      | 18      | 36                    |
|                          | 15. Training is as enjoyable as commercial games   | 2.64 (1.01)            | 21                      | 14      | 64                    | 2.64 (0.92)            | 9                       | 36      | 55                    |
|                          | 16. Child's motivation improved by end of training | 3.14 (0.86)            | 43                      | 29      | 29                    | 2.55 (1.13)            | 18                      | 18      | 64                    |

<sup>a</sup>Ratings scale: 1=strongly disagree, 2=disagree, 3=neutral, 4=agree, 5= strongly agree.

<sup>b</sup>Item descriptions paraphrase actual questions.

<sup>c</sup>JM: Cogmed for preschool-aged children.

<sup>d</sup>RM: Cogmed for school-aged children.

<sup>e</sup>Percentages may not add to 100% due to rounding.

<sup>f</sup>Percent agree indicates percentage of sample responding with 4 or 5.

<sup>g</sup>Percent disagree indicates percentage of sample responding with 1 or 2.

<sup>h</sup>n=2 answered not applicable.

<sup>i</sup>n=6 answered not applicable.
